# Supplementary material for: The Eye in the Sky: Combined Use of Unmanned Aerial Systems and GPS Data Loggers for Ecological Research and Conservation of Small Birds
Source: PubMed Central journal article supplement (PMC3519840; doi:10.1371/journal.pone.0050336), 2012-12-11
Supplement: pone.0050336.s005.pdf [file pone.0050336.s005.pdf]

**Table S1. Budgetary cost of the equipment used in this study.**

| Component                                                                                                                                    | Price * (€) |
|----------------------------------------------------------------------------------------------------------------------------------------------|-------------|
| <i>Teflon ribbon back-pack</i>                                                                                                               | 30          |
| <i>GPS data logger</i>                                                                                                                       | 800         |
| <i>Aerial platform</i> (including electronics onboard, GPS, autopilot, stabilization system, FPV camera, Eagle tree with barometric sensors) | 1000        |
| <i>Payload</i>                                                                                                                               |             |
| Panasonic Lumix LX3                                                                                                                          | 450         |
| <i>Antennas and tripods</i>                                                                                                                  |             |
| Video                                                                                                                                        | 1500        |
| Control                                                                                                                                      | 400         |
| <i>Ground Control Station</i> (including laptop, monitor and connecting wires)                                                               | 1500        |
| <b>Total</b>                                                                                                                                 | <b>5680</b> |

\* Prices paid in Spain in 2011, in Euros. It may vary depending on location.
